# Supplementary material for: A metabolic, phylogenomic and environmental atlas of diatom plastid transporters from the model species Phaeodactylum
Source: Front Plant Sci. 2022 Sep 22;13:950467. doi: 10.3389/fpls.2022.950467 (PMC9546453; doi:10.3389/fpls.2022.950467)
Supplement: Supplementary Table 2 — List of P. tricornutum plastid transporters inferred via in silico prediction, BLASTp outputs and localization predictions. [file Table_2.xlsx]

## Sheet: Overview
Table S2. Inferred chloroplast transporters in Phaeodactylum tricornutum.
This table presents the functional annotations and inferred Arabidopsis homologues of 70 chloroplast-targeted transporters identified in the version 3 annotation of the Phaeodactylum genome by in silico prediction (ASAFind, HECTAR) and functional annotation (KEGG, GO, PFAM).
Sheet 1 ("P. tricornutum transporter list") presents the gene name, consensus PFAM/ KEGG/ GO annotation, experimentally verified and inferred localisations, and presence of Arabidopsis homologues (defined by BLASTp search) of each Phaeodactylum chloroplast transporter.
Sheet 2 ("Filtered BLASTp original output") presents complete BLASTp searches of Phaeodactylum chloroplast transporters against protein models encoded in the Arabidopsis genome, with threshold evalue 10^-05. The final column ("homologue as plastid transporter") notes whether the retrieved homologueis annotated as a plastid transporter in TAiR, ChloroKB or SUBA4.
Sheet 3 ("Location in A. thaliana cell") lists the inferred localisation of Arabidopsis homologues (identified by BLASTp search) of Phaeodactylum chloroplast transporters, as inferred by combined LocDB, SUBA4, and WolfPSort annotations.

## Sheet: P. tricornutum transporter list
1GeneID	Consensus annotation	Sequence		ASAFind	HECTAR	2MitoFates	Homologue in A. thaliana Genome	Homologue as Plastid Transporter	Experimental Localization Tested
J41857	ABC transporter family	MRKATSCSVAIVTIVRITFSGFPFLSGGALAFAPWPRYTPTSPANAFSESNVANRGPRTALFGKKSARKGGGGKQQSRGAQAPQEKQSVKDARFDAATRQFMFTLVGLTKMLPDKSKNILKNINLSFYPGAKIGVVGLNGSGKSTLLKIMAGVDTEFDGTARPLPGASIGYLPQEPALPFATVQECVDEAVQSSQAILDEYNQLSMKLADPDLTDDEMNKIMTKTEQLTNQIEAGNLWELERIVERAMDSLRVPPGDAKTAVLSGGEKRRVALCRLLLANHDMLLLDEPTNHLDAESIGWLEQFLAQFKGTVVCITHDRYFLENVAEWILELDRGEGIPHEGNYSSWLEAKSKRLEEEKKKDTAAAKAVAAELEWIRSNPKAKGNKSKARLNRYDELLS…		Chloroplast	chloroplast	No mitochondrial presequence	Yes	Yes
J4286	Sodium/ bile acid transporter	MRAVALQLCILGGLLTARSVSSLSTSARLLPRRPVSPLSRSAVPARADGQRSLSHCFGTTVSSCQSIPRISTTPWGLSSSAGSSDSSDASVLDRLLGKGTSAFPLFVLASAILGIAKPQTLTWVNQGNLISVMLASVMCGTGLTLEMHDFKTVFQKDWGSVPLGVLCQFLIMPLAAFVVGRTFLFSSGPTGPSLFLGLCLVGCSPGGTASNLVSLIAQADVALSVILTTCSTVLAVLATPLLVKLLVGSTVAVSGVALVQATARVVLLPVLLGMILNAKLPRLARFLSRFTPFASVLLVSLICGGVVAQNASMLLHSPASAANLSVIGVAVLMLHSLGFAAGYLIPKFLFGKSERSSRTIAIEVGMQNSALAVVLARSIGAPPIASLPGALSATAHSCL…		Chloroplast	signal peptide	Possessing mitochondrial presequence	Yes	Yes
EG02328	Can‘t sure, CDD search: Na+/H+ antiporter family protein; Two tandem repeats of the cystathionine beta-synthase (CBS pair) domains superfamily; PFAM: Citrate transporter	MARTVIRTTFSPRRMALSIVVLVVATTMFQPERNGVTAFSPRVPTHRFASRTLSTSTSSSTSSFLRSSPLFGSSIDDGMLLRDECIITPEGYGFSCPTSRILKESGRGQGFYKASASESVIDVMEAITSGTSDVALVFQGDELLGLFTEADYIKFAQARALASSTEQQSAEFLVANVRDYITPAQDLIALSTQDTANVAVAAMKQAAVRHLILADTVSSDRKLVSSSQVQGVISMQDVMSVIQKDERLSLQSLAKKYPNIQNPVEQMKEELRSTANQLSNNPQTDKEDIIRVGTAVLMASAVAAFFSQSVWLHEHAQLVMIGIFVLGYMGIIFEEVFEFNKAGVALLMSTGLWVTYADFYNSAGTASTAVLEQLAEQLSEVSDICFFLLAASTIVEVVD…		Chloroplast	chloroplast	Possessing mitochondrial presequence	Yes	Yes	RbH homologue in Thalassiosira pseudonana found in plastid proteome
J54017	Triose-phosphate transporter family (TPT)	MMMKRALVVLTLSVGVSARASAFAPGAAVKNHAGATQSAIHKQTPFPTTELEKLRPQTSLALSSVGGAKAAEQPKGNPLVETLQVGSYFALWYLFNIAYNIYNKQALNVLAYPWTVATIQMAAGLAYFVPLWVLGIRKAPKLNASELKTLLPIALCHTGVHVGAVIALGAGAVSFAHIVKASEPVVTCALNALLLGQILPLPVYATLLPIIGGVAIASLKELSFTWLALGSAMLSNVSSAARGVLSKKTMSGKKMGENLDAQNLYAVLTAMSTLILIPAMLAMEGTSFFSAFSQVVAKGEYTRKSLAMLIGLSGASYYAYNEVAFLALGKVNPVTHAVGNTIKRVVIIVASVIAFKTPMSTGSIVGSSIAIAGTLLYSLAMNASKKK		Chloroplast	chloroplast	No mitochondrial presequence	Yes	Yes	GFP
J49533	NTT1 ATP/ADP transporter, CDD search belong to Major Facilitator Superfamily	MIPTTSVASHRSVVLVGLACTTLLLAVLSPSSTEAFAPSAHRYSPNQAVPYSGSLVLPRARGLAMGNPQNSALHMQTPWSKAGANKRKPRPTMVSPIQMSDAAIESNDDESDSKKKGFLQKIKSIVPPQEERQKLVPLALMFFCILFNYTILRDTKDVLMVTAPKSGAEVIPFIKTYCNLPVAIGFTGVYAKMTDSMELKNVFYACVIPFLIFFASFAFFIYPNRAILHPHALVDVLAARLPANFAAPLAIVRNWSFAVFYVMAEMWGSVVASLLFWSLANQITTVEEAKKYYPLFGLGANVALIFSGQYVKFVSNMRASLAPGVDAWAVSLNYLMGAVVASGGVLLATYKYIQDNVVAKSEAMKALKKYPSKKKPKMTLKESAKFLFSSPYIRDLALL…		Chloroplast	chloroplast	No mitochondrial presequence	Yes	Yes	GFP
J43785	CLC superfamily/ chloride channel	MYFRPFVMVIWHSCFFFMELICSVSSLPPTIVRHRPMGIGLLNEHRRSHLRRTARDVHSKDSTGKYYSDILGRQEPNLPEKQISDRLKYAEGIQEVLAKPMHVGTSLKFRPTAYDLFQAGIVGIFTGFSVALFKLSINAVKSLCYRQIFFQTNPVLMVTVPAMGGAAVGVLMLLGDFPPGLRGTVIEVDKESQGTVQKLRDRVQTQFRFLRKSAAATVTLGTGCSLGPEGPCVEIGMDVARSCMDISRRTAERQRLWNRMLLSCGAAAGVSAGFNAPIAGTFFALEIMHRMFSSIDGEENADKDASAGLSSLNTATIAPVLIASVMSALCARTLLGDHLVLALGGSYSLKKPLIELPLYMVLGLVSGTVSFAFSRAANLSQAVFVGDYGSDRFRMGVRS…		Chloroplast	signal peptide	No mitochondrial presequence	Yes	Yes
J39274	KEA3 by experimental test (CDD and PFAM annotated as Na+/H+ antiporter previous)	MTNTIPRRRTRRLLVAVDLGMLLVSIVLASLSNATAFSVTPTRLRFHLRTSFATAHKSANRRLHGKAAIRNAWTVRTARTAGYSRRIRPSSSELQALPPPDLFHYDALVSSFHSASHILSAGVSDVIENVNVPFKDLGKELAAALDIGQGMNKNLGMLPEGETSLVLESMGYDLLVFLAASVVVTPLAKSLNVTPILGYLLAGAILGPNGLDLFANSKADIELGDVGILFLLFSEGLEVTQPRLKKLTNYLPLGIAQISLVTAVITGVFMSDLPEWTATVFAIDPTLLGIPPTEAVVLALIGCLSTSAFIFPVLKERSWEDEESGEAATSILLLQDLLVAPLLVLLPYLAGDTATDYLAIGFLTAKATLGFGAVLYVGSLVLQNVFRVVSTAQSSETFV…		Endomembrane	chloroplast	No mitochondrial presequence	Yes	Yes
J22803	ABC transporter family	MGASSYVSGRVLRLANLVFVVVGFWSRLPSSDALVVARSAAQRNREYGAFRSRCPFTDSRNFRRVPLGLAASPNHKSNNSDNNDNNNENNQRSSEASTTPVSTNVESINKSKNQPVDADNPIDLNWKTVGKQIGLFQEMAFPYYKESKTGRILLTGLLGLTLANSGVSVLFSYLGKDFWNALSAKDTADFYNVLQKYLGALLLGAPVATFYKYQREQLAVHWREWMTARTFSLYASNRVYYNIERSNAIDNPDQRIAEDVNTFTAYSLQLVITLLTSLIDLLSFATILWSIYPQLFGAIILYAFGGTFITTLLGRSLVSLNFSQLQKEANFRYSLVRLRDNSESIAFYGGEDLEGQAIERRLENVMGNQRKINAAQRNLELFTNSYRYLVQILPVAVVA…		Chloroplast	signal peptide	No mitochondrial presequence	Yes	Yes
J23830	Phosphate transporter	MSVDMSPFLWIAVLGGICGFGYGFFIGANDVANAFASSVSSKSVTLKQAVIIASIFEFSGAFFLGASVTGTIRSKIIDINLYIDEPELLMFGMFTSLLSAVIMLAIATRFGLPVSTTHDIVGCIMGFSIAAKGFDSVDWDVARKLFMSWVASPLISGCVAAFLFGMVKYFVMKTDNPYQRAYYTFPIVLTIGLGIDIFYILYKASSNFSGFSDKLELYWVLPTSFGIGLFAGILWIFVFGPCAKKRVEHLKITRDEAEHEATTCDPESTPGSIAEDRKASNSREEIHDLDDSGHPMKESTDEPSSEEKSPSTIVDNLKLLSKKFGDSTYNQDLHAQSMHENPRTAEIWEQGEVYDPDAEMLFSYVQVFTACLNSFAHGANDVSNTIAPLSAIIQLYQDG…		Chloroplast	chloroplast	No mitochondrial presequence	Yes	Yes	GFP: cER?
J24610	Triose-phosphate transporter (TPT)	MKVATTLTLAFICCASAFGLNGQTTSVMKKVGFDAGSKPMVQAIDVQGNRLGSNMQPLKSAVANEDAPRGGATKSPVDIGLLLYFGLWYLGNYYYNITNKLALNAAGGKVGFPMTISSLQLGVGSIYALFLWLAPDARSRPKISMDDIVKMLPVALCFMGAHSASVFAMGMGAVSFAQIVKASEPAFAAVLSQFVYGKKVSTAKWLCLPIVIGGVILASVKELDFAWSALIAACIANMFAAVRGNENKKLMETPGLKDRIGTVGNQFAITTVLGFILSLPVLFLREGSRFGEFVQLAKTTPAIWMNLVASGLWFYGYNECATMTLKKTGAVTQSVANTAKRVIVIVGVALVLGESLSPIKLIGCSIGIGGVFLYSIIDNLVKPKK		Chloroplast	chloroplast	No mitochondrial presequence	Yes	Yes	GFP
J3046	Sodium/ pyruvate transporter	MKITQVACFGLCAVLSTTTAFAPALRTAGVTPRAVVSFSRMPMIAPTISTTTTSTALSATSLQAANGEAAGKSFGQKLFEGYEKTANVATTLFPLWTVLFTGLALKSPSSFAWFTTEYFTAGLAALMLSMGITLTPNDFKKVAARPNATLMQFALCYGMMPMLALGLGKAFALEPALIAGMVLVGSINGGQASNLCTYIARGNVALSVLMTTATTLGAIVMTPLLCKSLLGAVVPVDAAGIAKSTIQVVLAPIVIGMTTNKFFPRFVEKILPFAPVVGVVSTCLLVASAVAQVAEPILNAGLRLQIPIMLIHLLGGLVGYILPRLTGFGETSARTMAIETSMKSSAFGFLLAKLHFGDYAARVPSAVSVVWMALIGSLLAVVWRYIPVETTGKFDRSLV…		Chloroplast	chloroplast	No mitochondrial presequence	Yes	Yes	RbH homologue in Thalassiosira pseudonana found in plastid proteome
J34949	Unclear: CDD search as alpha/beta hydrolase fold	MRILCLLALVGSTYAWFLDSKSPSSKRAIPNNVKLVVLPGFGNNSNDYFLPEAPQGSLVRSLQNRGWRDDQIRVLPMERLDWLQVFVNGLFDLRFWTSNMAATCPSFRWYLKCVAGEIAEICEESSDTKVVLVCHSAGGWLARAALGYFSQAQADEQDVPRIELERVLGMVTLGAPHIPPPPEVMDMTRGALRITNEDFPGAYHIDDGLFYITVVGNAIAGIKDQRRSPFERTTPTGLAFNSYEAVCGAGTSMGDGLIPRMSAHLDDAIQINLDGVFHSINAPVRDVQAALLIPTPHSGKVTHFAVTLTG		Chloroplast	signal peptide	No mitochondrial presequence	Yes	No
EG02593	Ureide permease	MAFTSDEALGLGFLLSSLLCLGTWPALLRLCSMTPHSNSSNSSPATRVSSSLSPTPRNLCHVYMDYATTYFLISSVPLLVDLYHREKLLKLAETTASSFVPPQLIFVAMLGGSLLSLGNLSLQWATAVFDASLTTVLALQASLTVVLGTTLNYLLEPSQTARPRVLGVGVGVFLLAIGLATRAQIVYSQEKRWVRLRRNDSDWNTIEMEPPHHTSNIRKPTGSIAAKTNYGSELESSSLTNSETEHGDGTIFSDRNPVSICSTNKSLLPLSNEHTLALQKDYSLISKPMWGVVVATAGGLCFGFFSPCFNIAVNDPFNWRHLDDTNTDCTTPEYLATTAGLSVSRANFWFSLAFWMASALGNVVLLSWQQRSVSVYHVVLDYVAVDAAADRVWAWLAGV…		Chloroplast	signal peptide	No mitochondrial presequence	Yes	No
J10409	Na+/H+ antiporter	MQHRMHFAMVPSFFLPLVVGLVHHQSSRAVAEQEEEGSEGVLPGDDAFFETEGHEIPPAHAVLFPSFCLTIGVMVFYLLSRFLNKLPYTAVMFFIGTVMGIGAELLDDSEDQLNESIRLWIPIDSEVLLLVFLPGLIFKDSLGQNVHLFQKSIVQLLIFAFPLVLAGTVLTALIAYYIFPYGWSFNLAMTFGSILSATDPVAVAALLEEVGAPPRLKVHIAGESLLNDGAAIVFFSIFVARYLFELGIEGVGEDVDWGRGVAMFCQKAIGGVCIGIFFGLGLLTILFLLKRRFNREENVVEVTATIAIAYIGYYVADAVWATSGVIATVTLGLMIKFLGRAMFNDAKLLEDFWTLVEHLLNTILFTLGGTVWVRTTHPPGAVIANGGKEKLFTGRDWGY…		Chloroplast	signal peptide	No mitochondrial presequence	Yes	No
J10896	Mitochondrial carrier protein	MADVIPIVNSPRMSWMLLSSVLLLILLDATEAVRWTSVASTGSPFSPVALGVRSAWVGSGWRVRSSASSSRQGSPSRVLSVAYERHADEGDESEEEQRAVENAYWRPATEADAYRLRHATHAYLQRPKYQSETELDHLEALTIPCASRANPSPSHTFPPSDHRGGAAAAVASRPLLFWETMICGATSRSIAQTIMHPANTMKTILQNARRGPAAPTIVQLARPENFRRLTRGAGANFLLSLPHGAVNFAVLELVRSKLGNVVAASPGLADNAAKLGPGLDFLSSCISTVTCSVVSTPQMMITDNIMAGNYPNLGAAIRGLYRERGVLAFYRGWWPGLVGKIPSYALTWTFFQQLKTARDRLSDRPASDIENSAMGCLASATTVCIMIPMDTIKTRLVTQ…		Endomembrane	chloroplast	No mitochondrial presequence	Yes	No
J11414	Mitochondrial carrier protein	MTSSRSLGRSLFLFAVTITATTNAFRSAPLARTAFRTVPIHPSRQLVPTPRYAIESASFRRCSGQRFPFGTSTTDSYNESNTDVRRWKSVLIPRHDLTVGDASQPPHDGMTTGDKVVFGASSIAAAAAFFWLVVASGPGAWRYYLSGGICAATSHAIPVPVDVVKTRKQVDPVLYRKSFVEATKAIVEQDGAGALLAGLGPTTWGYMLEGAVKFGVYEVLKPPVRKALISASSTTAAFAFLNSKLLAFATCAAVSGFAASIMLCPMEAVRIRMVAEPSFAPQGWIQCGLKMLKYEGVEGLWKGMTPMVYKQVPYTVTKNVSFDFLTRSTYAAMRQNGVVMSSAVKVSVPMFAAFVASLLSCVSSQPGDMLLSLVNAHKGKRRTKDIVRDILRTDRGIKG…		Chloroplast	chloroplast	No mitochondrial presequence	Yes	No
J11866	Mitochondrial carrier protein	MNILPTRTPATASPSLRSVPVGRLGSGAFLLVVLLPIFVSLPTVTAFAPATVRTTTVRSWLSFSRRQSTPQYNFRSRRTRSAATNTPTEEVDNDEASRSTLDSQNLLRAADTILQASPGIYGAPEINDDNNSNNAETSPIKSGHSAPSIATPTSRRILFASSLIAAGTALGGTGPGVRDAVAATSMSTSLALEGTKLQWQATPVNRRTGVTVYDAEQAGYNVRFVTYLSRFLLSFDPDCQRWWYNRAKDLPRLANSEQVNAQRLAQFAAFSASVEVGLQEYRDAEGPPRLLKALLTRYSPDDSEFLQRATAGSASPPLDEASKQKLEREIKAARRHIALLFGLMETNQPTKEITKVLAAIDNGSIVNVQIQDSGSGYAPGYGTPAVVFPEPDAGPNFER…		Other	chloroplast	No mitochondrial presequence	Yes	No
J14403	Na+/H+ antiporter	MVEHGGTSWHQTSRGVSILITIYLFLFVFVMVLSKFLHDLPRLGSILPEAALVILVGMLAGLIIDSVAGDVQADGVADDVARSMLSFSPSIFFVVLLPPIIFNSGYHLRRDLFFRNIVPICMYACIGTAVCTMVVASILYVCVPLFGFGFRPTFLELAAFGALISATDPVSTLAVFQSKKVDPHLFYLVFGESVINDAVGLVLFECLAHLIEKQQNQLNVGQEFAQFLYDFSTGFLGSLVLGTLFAITYALLMKHVDMRKTPFLELCVYITMMYFPFVAAEILRLSGIVTVLFTGIASKRYVEPNVCAETAVNADIVFRLVAHLTETIIFLDLGLSVFGLVGDGAFRIVFIAFALLACLVGRAVNIYPITYLFNMVAGRGKTIPPPTIGNEYVAEGTSR…		Chloroplast	signal anchor	No mitochondrial presequence	Yes	No
J14544	ATP synthase-related transporter	MLQFFFYLRGYFGAASCIILSNWGAAWGTWKSGLGLCGMAVNHPQGVIKNLVAIIMAGVLGIYGLIVSIIIAGAISAPSNENGINTYSQYNGWAHLAAGLCCGLSCLASGGATGVAGEVGIRATGLRAELNHAKTSALTGGSGAQVVDEGDAGKMYIGSVMILSFAGAIGLYGLIVALIITSSSQYYCE		Chloroplast	signal anchor	No mitochondrial presequence	Yes	No
J16142	ABC transporter family	MRIRCVVVWVGTWTTLTSAWMMPGRTSSIAPGRHRVAHRDVTLASTVAAPDEVAGTTVGDTKGAVLRLADVAISRGASSLLQNIAWSVQTNERWGIVGPNGAGKSTLLGAITGTVRMDRGAALVGPKVRVGHLRQSAVSGSVRTLAEEARSEMVEIEHARERLHLTTLVVEGGDYSDQALAELGEAQEQFEKAGGYEQEQMVDSVLKGLGFEPQDSHRLCSDFSGGWQMRIALARLLLSKPSLLLLDEPSNHLDSSARDWLGKYIAKYDGSVVLVSHDVELLDASVNSIAEISGNTLLEYRGCSYSKYLDEKEFRAQSAEAEYKRNLEEAARLQSFIDKFGASATKAASAQSRVKMLEKMKREGKLDPPPVAVVSRGPQPELVLPPPPKPNGENLLALT…		Chloroplast	signal peptide	No mitochondrial presequence	Yes	No
J43105	Iron transporter/ GTP binding protein	MSYRFLTLLSIFHLMLTVSAYCSRARQRLLPLTVNGLTSLAAIAPVSSDEVIRRNNALTRNTGGLRRLPVVKAPNELIDRARKDAYRVKTDKELKNTRNRAKKHGAETLNALSQGLCLPLRDLVNGYKSEWRRLHPFERVVADLTARARQKKDGLTLNTLLDEIHEARKMVLDSSKDWISKVKEAETAREAGEFMEEGIESMTVLFRELAAPPVLGILELQRSLRSAPTVALDTPAVVLVGAPNVGKSSIVRAISSADPEVNNYPFTTRGMTLGHVEVFWSNTEAIAKAVVPDAKRKLGAVAEEVVLGKYAFSQLCQVMDSPGLLVRPDEERNEMEALTLAAMQHLPTAVMYVMDLSGEAGDKCSSIADQLQLRREVRQRFPRRPWIDVVSKIDLGTTD…		Chloroplast	signal peptide	No mitochondrial presequence	Yes	No
J1764	Na+/H+ antiporter	MSDTSDSTASFDSTASISAYIVLFSTLLTLVLVGAKFLHDRPVLASFLPEAGMTLLVGMLAGGLLHLLMDEPDYNNSNNSNNNNDRNDNTVVVSLLSFSPQVFFIALLPPIIFNSGYHLRRELFLRHVLPVALFAVLGTIVSALTIAFVLWAVTHGGLAGNDFRPALTELLTFGALLSATDPVSTLAVFQAKKVDPQLFYLVYGESVLNDAVGLVLFSAFAHFVVRDNGAGKVALGMGEFCLEFALDAVGSPLLGTACGCGAALLFKWVDLRRTRLLELSIYVLIMYVPFLLANLLQLSGIVTILFTGMTAQAYAAPNLSPATAATADVLFRLAAHLAETAIFLELGLSVFGLHGSFHGRFLLWTILACLLARAANVYPIVVLFNGWLQSNPLNADEEQ…		Chloroplast	signal anchor	No mitochondrial presequence	Yes	No
J50613	Pheophorbide a oxidase/ Tic55 protein?	MALRRSISRLAMVYLVTLCLKTAFVSAFSSTNTPTTPTSSVQQRSANQQALEDAPPFPRTWVPLASVYELHPDRPTPLRFLGQSYVTYQSNDGQWAVFDDACPHRLAPLSEGRVDRQKNRLECSYHGWEFDADGRCQEIPQADFSTMQKAMQNERCHVKSYPVHVEKNILFVWPWADEDPLITVSQPHCAPEHFMEGVSENCTTYTRDLPYGWDTLLENIVDPSHVPFAHHGLQGKREDAIPINMTSPSDLSPEGFVFQFEDRTMSMRRQGGAVFRAPFVIHYKADFETPSKEKQKKRANSPKVFNLTAIMLPTKPGWSRIILMGAPRTKQIEKKEKERLVAKIFRKLPSWLVHTFSNRFLDSDLAFLHFQEQERERRGVDARAYFMPAQSDRCVSALR…		Chloroplast	chloroplast	No mitochondrial presequence	Yes	No
J52200	TatA/B protein translocator	MMKSTMRLYALVTAVLVAYVQAFAPVSRAFRTVSPVVSNTFEIHHVPALQRQRRSIATVQTMGLFGLGVPELAVIAIAAAFLLGPQKLAELGKDAGKIAGELKEVPAEFQKGLQEGETKAKSLKDEISVKEDEEKKDK		Chloroplast	chloroplast	No mitochondrial presequence	Yes	No
J47958	Unclear: 2Fe-2S iron-sulfur cluster binding domain; NADH:ubiquinone oxidoreductase	MMRIFLPTLVAIWAVHAFAFVTPPYPVFLQASPTVLRTASQGATLDQHLMDLAQKFKLEIFDLDEGLFGFDSKDNRYGLEVVHTNIDVGNDGLGLVLTEMAGSPDGRGLVMVSKITGNAAKANPQAIHVGDTITGVMANDGVLKERVTAFNYDKTVEAIGRAKESSTDGTITLELNRLIKRLPVRVEIDDGSGHVQVIEALAGENLRRMFMRKQLKLYDERTRRFDQPFNTGNCGGDGVCGTCLVNVLQGMDLLNPKDSHEVFITKGRPPSWRASCRTTVGFNNVGGTLRISLHPQSELPEELSPGVKSLKP		Chloroplast	signal peptide	No mitochondrial presequence	Yes	No
J46742	Mitochondrial carrier protein	MRTSFGMQLSILVLVVHTALSFTPQSAEKPTMAAWKRPSTDDVSHSGDQDLTTKDVSRRFFLGTAVSTGIVLAGSNIANAVDEETIHVPANLISAGATETVDWQGIFQKASKKALGGGKAGAAAAVVQVCSLMWLRTSMNYQYRYGGNLQSSLNTLWAEGGIGRLYQGLPFALVQGPLTRFGDTAANVGILVLLETLPATQDLPLPLKTACGSVAAGLWRIVLMPVDASKTVMQVEGSGGLKRLWDSVLESGPSPLYRGALAQAAATAAGHFPWFLTYNYLNDQLPAVSSEADLLLSLARSALLGLSASCVSDCVSNSLRVVKTTKQTAQVGEGSDSKKEITYPEVVAMILEQDGVVGLFGRGLQTRLLTNMIQGAVFSVLWRYFQQVGV		Chloroplast	signal peptide	No mitochondrial presequence	Yes	No
J44888	Multidrug and toxic compound extrusion family as CDD search and got BlastP result with MATE efflux family protein	MRGVPFSGVVGLATVLVIQPLPLRGFVGQRSFRVAPFPTKLTVPPSQQQGPRLSKRLSPNRAASNESISADKDHEAAQYTSDRIQSLKNKLTRDFVQIGGPALIQLAAEPLAALVDTAYLGRLGPEVLGGAGVAISAQYAVSKLYNDPLLRTSISLVASQDGKARGKEAATQADTDKAAKELSVAVSSALLLAASVGIIQLLVYSIFCKAITGGMGLNPSSPMWHSAVSYLQVRAFGTPAATLWLVANGIFRGLGDTRTPLWYSLFFTALNAVLDPLFIFVFHWGASGAAAGTALAQYTALVPLLFALNRRVRVDILGQLGALGESLQKYLKAGSLVLFRSLGKVLAYSVCARQAAMLGSVSAAAYNLTFQLGFATTQICEAVAVAVQTTLARELADTD…		Chloroplast	signal peptide	No mitochondrial presequence	Yes	No
J45119	Chloroplast ion transporter	MPSISASVKLSILLACIASLTSPALSFTPLLSSLAASVSKLQAPRSSVCLSKRSSPSRSNGALTMHMGHSHSHHIHTHTEELKNKQLQTKKRRRRAALFLFTALAILGPPLFRQRTLTRTDVGTFLLTSTILTMSDTVRRKIQHAIRKIGQLREGIVKHSSPVSPGKFLSYLFRNDNAADRVTLLGSVINLFLSAGKFAVGVSCHSSALIADAGHSLSDLFSDFITLWAVQIGRLPPDDDHPYGHGKFEAIGSLFLSLTLLATGISVGAASNRKLIEIITIQRASGWGTAASLAGQVPTSPALFMAALSIFSKEWLYRITKQVGDRLNSQVILANAWHHRSDAYSSVLALLAIGLAMYFPAMIAADSAAGILVAGMICMTGAEIMGESIKQLTDTSNEA…		Chloroplast	signal peptide	No mitochondrial presequence	Yes	No
J45335	Chloroplast transport protein Tic20	MNLSTRQTALLLAVLTTTTDAFAPSRSATATFRAIVTSPKFGIVPKVPLRSAPVLKSADTDDEEIERLKSMAAKLRSEAANLEASQKQQIADAAERAFRKFDTNQDGEISLAELKAGLEKNLKMELSETRVKMLMHDFDKTGDGTLKLEEFVTVEQFRNKLDALARDEKAQALQAKRAAQQEEEASKFLQARLDMINDRAPTTQDKLISVLPYLFPLLDGLQFARFLVLENPDNPISGIIALSYALYRSIPFGGFIAFFALSFLSGNPTINRLIRYNMQQAIFLDIALFFPGLIAAVFSLVGGGKFLPQGVTEIGSDVMFVTLLATLGYCTVSSLLGGTPDKIPIISEAVNARIPTVDMFDVQGRFTPKRTDSPNAETDEDDERKKDKKD		Chloroplast	chloroplast	No mitochondrial presequence	Yes	No
J45579	Unclear: CDD search as alpha/beta hydrolase fold	MARVLRVAAAWWSLTAVNGFQSTVPQSTTRPIVHAPRTSDTVLGASLSSTPENKKNQPSTIQTPYNETGKLGKLERVALLVCPAQFCVPDDYAVLFENLRALSSDDAATLAWPRIGTCVVAPLPRTEWIRVARQLPTRAFWDARLPVHSTLDWYFDAIEKGLAQIFAQEGEDVRICIVGHSIGGWVARAYLGGLGRTSSAVYRLASTQVSSLITLGTPHVSPELALVDQTRGLLREIADAESCSPETLAARGIDVTCVCSQGLDGNFWTTNVEELVAASSYWPLSGSFRGAGDGIVPLSLAFMEEPSRRIVVESCGATMLPVRHSHVVPTPWNLWNGYAPSIILPDTTFPSYVSKGVVAQWAQYIR		Chloroplast	signal peptide	No mitochondrial presequence	Yes	No
J45656	SLC4 family HCO3- transporter	MTNLVSRAYIVALLCMSSCWHSAAFHTTSFGKTSLGLKISSSRSPTFSSLKKAKVIASVTTKPLTKLSDSMSVVSPPVDERENNKDDETLFEGPFKGIIRDYKARLPLFASDIKDGLNVQCLAATMFLFFACLAPAVGFGGLFDVATGGAIGTVEMVSSTALCGLIYAITSAQPLTIIGSTGPVLAFVACLAQLAKMLNLPFLQLYSWTGLWTSAILFVSSITSASNLVKYLTRFTDEIFSLLISCIFVFEAVSDVGRTFSSPASTFTKALLTLTCAASTFTIATLLKGLRKTSLFPSRVRNTISNFAPTIGVVTASLIARWARVVHGTKLAGLPSLSIPAVFGTTSGRPWLVPILDFPVWARWAAFLPALMATVLLFLDQNITVRLVNNPRWKMEKGR…		Chloroplast	chloroplast	No mitochondrial presequence	Yes	No
J43342	EamA-like/ Drug-Metabolite transporter family	MSSFKRQISLCHFLLITLLGSESAAEAFATKAQLVPSTRARNARHHATVPVLLRSIREDSAEITKQPGSSDSGRIGFEDSAVSRYLQSKLAVTDETVGLLVLLTVPVVWGTYVPVVRFLYEIDPPIPGFVFSVCYFALASLTTLSMLAFGNTNELFRSQPTNSEPIGSLGREEDYPETSAVFDMPILGGLELGGYLFLGNCLQVVGLKTVSADTAGFLVQLTTILVPLFSAITAGNLFSVSARTWIACLIALGGITIMGIDLPERVDSLTSLLASFSTPTVVPSLAQGEYLILAAAVSYTMHVVRLGQYARYTTPLKLAAAKATVETVLSGLLVLVLVLVAGDGSSTATGVLGYAQGAGREITAFFADVQERMAEGTLATSSIQKAVGATMWAGWVSTA…		Chloroplast	chloroplast	No mitochondrial presequence	Yes	No
J16421	MFS domain transporter	MPNFPLIFSGILAVNVLVTVLSSERYKNYNKKKMIESSTSDSNSNSPTPAVNEEQRQAWQRLVRKYLLVYLLATLSDWLQGPYVYALYSDYGYSQHDIAVLFVAGFGSSMVFGSFVGGMADWGGRRTFAVLFAVVYACSCLTKHFKNFNVLLLGRLLGGVSTSLLFSVFEAWLIRAHNDAGLKAWLGKSFSWAAYGNSVVAITAGLVANKAASAVPMTAIQTGGQVYMGGYLNPFDIALVALLGCGIAALSLWEENYGDTDGSNDSSRGQAHWYDGLQTAFTTTIRSQDVLLCGIISSLFEGSMYIFVFMWTPALTEGSDEALPFGLIFSTFMVSCMAGSSLFSIQIEKMRGERLAVIVFATASAAMAGIALSYSNTVKFLLMNVFEVTVGMYWPIYGT…		Chloroplast	signal peptide	No mitochondrial presequence	Yes	No
J18945	Major facilitator superfamily/ sugar transporter	MKNQYSLVKYWCTVSLLSAAARTSVTAFASPAHQSEQLFLRRSGSASTRKYNSLGMSPFPFATTLSSSQLHMSTVPASLQLLSISTVTAIPRGGAISTLQTTLTTKLSQCAATPQSLFNATLLSLAVLIAAAKILQRSNVDHSLKKNIVKAPAIQNLQRRFLAVFWLLRCADWMQGPYFYEVYASKMIGGAQASMSLVSRLFLTGFASTALFGPSVGRAADQYGRKKATLAFCAIYALGALSTKSPLLQILLLGRMLSGIGTSLLFSAPESWLVGESQIVGQDPDGKYLGETFGLAYAGDSLVAILAGQMATTAASQRGPTGPFELSTVFLALGGLLAAWSWKENKAQTIDNEKPTIREAIQVIREDPKIMMVGGVQSLFEAAMYIFVLQWPPAIAAAV…		Chloroplast	chloroplast	No mitochondrial presequence	Yes	No
J22325	ABC transporter family	MLQKNHRILFTINFRLRYAIPWFLILALSPSGDMAYIGKLTTRPLKKNSSPPFTIDRGSSGTVRLHSHLLVEEAGPRISFGLGYYDPNEICPSTKPLTASVTFFAHYVLKLFKENRRRKLIRKCRQRLGSTKSKNGSSGWLKTLSNLNEQRRNLATLADYTASIVTPSFFFLILGALMTSVIPHYYAICIQLVATLDGTRAKVFQALTGLVVSSTLGALFTGCRGSLFWIAGSRANYNIRVKLHRSLLLQEAAFFDSNETGYLLSRLNSDVNKIGMVISYHVNVVCRQLAQFIFGSAYLIRISPKLSLWTFAGIGLVAWLSAIYGAFNRVLAQRVQDTFADATAVAETSFSMSETIRAFDGVAVESNKYETAQSKALDLEETQAWGYGTHKFVSDTLQG…		Chloroplast	signal peptide	No mitochondrial presequence	Yes	No
J22332	ABC transporter family	MLQKNHRILFTINFHLRYAIPWFLVLALSPSGDMAYIGKLTTRPLKKNSSPPLTIDRGSSGTVRLHSHPLVEEAGPRNSFGLGYYDPNEICPSTKPLTASVTFFAHYVLKLFKENRRRKRIRKCRQRLGKTKSKNGSSGWLKTLSNLNEQRRNLATLADYTASIVAPSFFFLILGALMTSVIPHYYAICIQLVATLDGTRAKVFQALTGLVVSSTLGALFTGCRGSLFWIAGSRANYNIRVKLHRSLLLQEAAFFDSNETGYLLSRLNSDVNKIGMVISYHVNVVCRQLAQFIFGSAYLIRISPKLSLWTFAGIGLVAWLSTIYGAFNRVLAQRVQDTFADATAVAETSFSMSETIRAFDGVAVESNKYETAQSKALDLEETQAWGYGTHKFVSDTLQG…		Chloroplast	signal peptide	No mitochondrial presequence	Yes	No
EG02492	Sugar transporter	MAASIFDGCSDTCGWIAAVLAVLSFGSFGVPIKLAGKVEVHPLVMQSYKTSVCFLTCWLVILLGEEPRWTPYGIVSGLFWVPGAAMGIFGIRNAGLAVAVGTWSSITVLTSFFFGIIVFQERVKSFYQTCLAFGCLIIGLIGMSRFSAHQQQVDTLAVSYRSVKTAASHPLGLGQKLKRAGSTIAENSITVPLVGASGVIPMEIEPFATDGEDIVMGTYDDAKSVLSKDRLVLFGGRVSLTRRQMGILGAVINGAWGGMNLIPLHFALQEEDMTGAGYLISYATGSLIVNTCIWLAFLGYYLHQTNGHWNEAVDCLPKWHFEHLLIPGLMAGLLYSFGNFCSILAVTYLGQGTGFSFCQMQLFVSGLWGVFFFKEVQGTDTITKWFISASVAVLGIVWL…		Chloroplast	signal peptide	No mitochondrial presequence	No	No
EG02514	Unclear: CDD search belong to Sulfotransferase family	MFGSKDLRRFRSRSVFFGAILGLASIWSFYNLLQVTLQTNPLDQILLERYPTGKWITGNSFRENVFDAKRECPVSRSDFRSASGVFAIIAGCENSGTTVTSEFIMSAPYLLGAFECGILLSPTPSDFVNVHPFYEWITDGVEKNQWALSTIQRERLLNATCHAEMYSMLHIFSPVYRHFPDSLIVDKTPGYIYELDAVMDRSPGVPVVVSVKSDEDQLRSWTKRYKKPDQTSLLERLQKAKQGLQRALDKYPGRIHVVNTTELYKDPNKAMDQVYDFLGLQWNPEFLSLKHFNIKGKTVGFPQVQPFDAEWQ		Chloroplast	signal anchor	Possessing mitochondrial presequence	No	No
J16222	Na+/K+ ATPase	MKVVSLWKNAFALLVPLFVLIDAASADFDDFVDPTYDCPALTTCPVICAENATACPTPSCAAGLTLCADGSCADSCSSRANRNPCPQTCLPFACPKIIEDYETCQRDFEAFYANEEVCREQEEDAKNSFSAGPLSILGLWLMAVTMSVLGWCRMMRRYHTDAVTQPLEDGQTQTGYRETILGQILYYSVVITLLGIQALLLAFCITSYRQNEEEALRGFEITWCIGFVWTIALKWPCSVASLFLVPCELSLATQVAVFTETRSTSSRPVQGKREAGYIMHMRRILSRFTSGFHSCMSGLFSVPYRTAHGILQYVPVQNERDANLPSTYYFVYQFRRYNLDDERGYYVPGKMNPEYRTVADVLKGVDGLTADEVTQRLHIVGPNVIDMPKPTLLGCIGID…		Chloroplast	signal peptide	No mitochondrial presequence	No	No
J32491	Unclear: PFAM search as EmaA-like transporter family	MTRSNWGHVLVGVLLVTFLTPALTNYALFQIALALALTLGSVGPLYSLPLVFWYHHKAPTLTATLGAVLAVAGIVILAFRGTLENNGADSEL		Chloroplast	signal peptide	No mitochondrial presequence	No	No
J32535	EamA-like/ Drug-Metabolite transporter family	MSKDTDRERRSGLLVLLTVPVAWGTFEPAVRYLYTIDPPIPGFVFSTCYYLVASSSLYLACFLSQTKKSDGNKSLEVSQPWPIQGGLELGSYLFVGNALQVIGLQTVPSDRAAFLLQLTTIFVPLLDATLARNLYAIPGRTWMACWIALAGVATMGLDRSNTSNSFQNLEPSLGILNDVLSQLSGGDAFIVAAAIAYTFHCLRLESYAQSTSAVQLAASKATTETVLSAASVAGLIWYSSSTGYDKLSVEELKTHSDHLNSLASFARQTGQEIVNFLSSVENGIASGSVSFATLRPALLATLWIGLVTVAYTIYAQSYGQSRIRPVTANLIYTIQPICTALFAWFLLGESLGPAGYAGGALIGAAVLLVA		Chloroplast	signal peptide	No mitochondrial presequence	No	No
J32902	Possible lipid transporter?	MVQLVKTCFLIFIGQQLADAFGAKEHRKLRNLTCISTKTIRQDSEMLRDAKRPHLIFPGGGIFFYWQAGAVTFLRDNGYDLASTSSTGASAGALTATLTTNDVDFYEATDLALRIAKDAGVWDRNRGLQGIWGPMIYDWLDEILPADAAARSNKRGLSLLVTKIPSLGTEKICAFDSRKDLIECNMASVHLPWFLDDRHYIDGSFLASQRDYHSRRKSSSTLVFDYKEDPFHRSRSLIDAVEALSPKGIHELLEDGKRFAKLLEEQGKLELLSKK		Chloroplast	signal peptide	No mitochondrial presequence	No	No
J35587	Multidrug and toxic compound extrusion family and similar proteins；MATE efflux family protein	MISTGWRKTHSLAFNKESPKANFGLGMRFLFVCVLSGLCGTTNAFVPSVRSAASLHGRDSLQTQAEKVSRRWSNLNDVEDDLFDPLRDRLSNMNATIVAPEATETDVVDNTLLNLVVDSDREPHPLGWKRRLTQALSGRKAGRQLDKLILSTSIPSMINLAVVPLVNSVDTFWVGRMGSALALAGQAAANQAFFTIFFLVNYLPTITAPLVASAVGSGNQDEARARVCESLFLCNVLGLMGTLSLTLFPQWGLSMVLQDGAPAMEYAVPYLRLRALSMMPALWSSSGFAAYRGLLNTVTPLKVSLATNLVNLVLDPLFIFRTPLGFVGAALATAISETCSGIVYLRLLMKRQLASIKLLLRPPSMKALMPLLQGGASMLGRQLALNVGFISAARRAQSM…		Chloroplast	chloroplast	Possessing mitochondrial presequence	No	No
J35625	Mitochondrial carrier protein	MKGSAILPFALLSCLVAQAIASSFGGTTWAPIFAGRSHKAISRRTLTHGSNHRPSPSIQAGLGFLDGADCITQVYPCRSIGNTLLRGALLRIASDLSGGTAFETVKTRVTIFPESPLEALNNIVKEGGVPALWTGSQSRTIEGALVGAVFMLGSVLTKAQVKAFGGGPTMAALAGGLVGGVAQAFVMTPAGMIFTSLNYNRGRKGFENDNAMNVIHRVVDEKGLMGMYSGFRPMALRQATNWASRAGFTEICRSVLGLSQYGLLGELLSGAIGGVGSCWNTPIETIRVITQRDIAAGRPQLTMKEQWDDIVDAQGYPGLFRGVTPRALQAIWQTIFLVVVPNMMGI		Chloroplast	chloroplast	No mitochondrial presequence	No	No
J36253	SBF-Na+ dependent transporter	MASYRNSDGLAPSRKRLHFRAFADKNSFLFGMILVVSLARAFPTLGANGSFLRPELVIAQFGVSFIFLLMGLSIQALSNIKLISLIQFCTFGVWPFLVGIPLTKACTWLLPNALPKPLLDGLLILSCLPTTVNMCVILTSAAGGNVASSVCNAVLSNLMGIVVTPALLFHFFGSSIQLPFLEMCLKLCGKILVPVALGQLLRSTIAGEFSQKYSGFFKRSQEFALLSILWNSFCTAFVQGFGIEIRHSLTLLALLPTLHVASLATLFKIFSIPAIGLSRSDVIAGMFVASHKTLAFGLPLISTVFAGDVNLAAYSAPIMLLFPLQLIIGSLLVPQLEIYTAKL		Chloroplast	signal peptide	No mitochondrial presequence	No	No
J36726	Glycolipid transporter	MLSRLPFRCMLLLLASSHAEASAAAAATGNSFRKTYSAAASRRAKALSRPLLKSSVKYRRIVAPTSISDRSRRMGALMVAELKRKLHTKVADLSEAFEPVLKARGILCELDTLYLLKACRKLEMTMKLIGQRQSAREMENNIHKVEALYHSAPHARRKTLEMLLEYEKELGIHQPNGILKDPSVAMGFLWIRRSLSFQYKMYSLILDSNLSTTEAALSAYRTELEPFHGWALQRIHTLALKTTPPSHELLATIGGFRDENFGRIEEEVVRRDLRQLLSTWRPILTRWKNDYAKLDLEDKRQV		Endomembrane	chloroplast	Possessing mitochondrial presequence	No	No
J37674	MFS domain transporter	MARHVLVSRRDQLALWVTYLNIVLYALCYQLQKPVEPFLVQTLAENANDADAVARKYGELQSFFSAIQTVGSPLVGILLDRAGIRFASASVFFASALSYAILAVATDINLLFYSKLPTALQHAFLVAQATAATSTAGDDSARAQALGRMTTAYTIGVFLPTVASSNNAPYRKEIRQRSFFDEVRHSFNMATRPILLPLLAVKVIAGLAVSIYSTALPILLTRDLKFDPATLGLSMSSSTFAVAVFGAVGMAPLTSQIGAPGMAKIGLLIRAFLGALTALVISQGTHARFPIPVNIMAISVLHGLASHMLATGLTTQTTGAVEQDEQGALLGLEHGLFSLARVGGPALGTSFLASGSSGFWPVANVCGAIDLALALALTLTTLERKSKEKGQ		Chloroplast	signal peptide	No mitochondrial presequence	No	No
J38786	Magnesium transporter	MASKTLFATGTVLLLHAAYSCLHYRSLLQELEDAVLEDADSTHRLPPVDVWIEAISGFLILLVSELMRAGSGLHPISKTGGTRLMAPSYQTRDFDIYSTRSKAL		Chloroplast	signal peptide	No mitochondrial presequence	No	No
J38821	Ion channel protein with EF-hand motif	MTTPCGHQWKRTLLCPRLLAMRLLLVIGLLQEAASFSTAGCSNPASYRARPALGLVPLLLPTTVRLNTKARPVLAKTFPTMPWSTLAAGSSDGIALSDTRPEKLWRFFWRSLWKGMTLPFPALRSMVLDVSQPQNASVGFRIRESLAAIVAYLGIGVLAYYCVLEPTWTVVDALYFTVTCFTTVGYGDLCPSTPQSQTFTALFGILGVAFLGAALATLSSKLVQTQVEVLQAVRETSKQRIKALFEQVSPLPMSAATTSTATTSHVSQSNWQSPDSTRTADTVLLWRRVNALVWTLVRQILPPLLIIVGGAWLVHHLDAPTMMTRPWRDVVYYAVVTASTIGFGDICPVSQRAKLAAVVYIPLAVAAAGELLSGVATRILERRQKLVYRQQLLADLTID…		Chloroplast	signal peptide	No mitochondrial presequence	No	No
J39402	Calcium permease	MDESSSTEVVISWSGIWVTGLVSFVQGLVFYSFFRYRRGKDAPAEQYDLYEPRQHTRQHRSPPPFAGSWYKAAWNVSQEETLRCVGLDSYMFLRFLRLGARICTMGCVLALVLIPTYATGEERGRSTQQFNQLTLARVSADSKRLWASLIAWWIFVGFVLYELWNEWVLYAHNRYEFLARGDVDMPKGYRYAVRVEQIPPAYRTDQALLDYFERLFPGSVEQATVFWKTDKLQALIDERQVTIEKLESAVAFTHGKPNKPRPKVKVGATMGLCGGSPTDAIEHYKIEIDRLNEAIDMERSMFDSSEAGKATSSKRVDVDDGNIETSFSAEDQHSGKADTSTAFVTFSNLRTKQAAVQCELTGNPDSMIIFPAPDPKGVLWKNISVPLPQQKILQVQAAA…		Chloroplast	signal anchor	No mitochondrial presequence	No	No
J42868	MFS domain transporter	MKDCRLTYASGLLCLIVSSGTSFSTDCPLIPNASFHTLPSSCPTTKNNQSLRESASKMTHINNMIACSVGGGAKTRSRLPSKKQQVALRATQAVELEEGEQRQIQRRQERGMAIALSSVYFTVMGAKCALPSVLPMLLAPSTGLTFSPSWTLPPQQLMARQLTVATLAVAVGKLVLGPVIDHVGGIRSLQIALSLLAGLLALISTTQSFLVFAASWICVDFIFSSCWAGCINAIHQAFSADQWASRVGMLAAAARAGNAVAFALFASVLQYFGTRMVQPWRVVFTVSAALQVVSVALLTIFGRGVSDKASADPSEESFVPNKKPTMKDSLLVLRRESKTPEFWLHLVSRSCLMVFASFLLFVPTLMSQVYRSTPAFAAQTGSIYAVGCLLSISLGSSLY…		Chloroplast	signal peptide	No mitochondrial presequence	No	No
J43171	Ion channel protein with EF-hand motif	MTLYKKTVLFWWCTFCIGWRGAWSLASPIYQLRRPGARLPPTPKSKLRRDYSSLNDSFLSANAKRRHGRKRYGPLQTFARSFWKGVTLPFPALRRVVLIPGTQRKKGTRGNISVGLTLREGFLAVTAYLAVGVLAYSVVLEKWSLVDAMYFTCVCFSTVGYGDLCPTNTASKAFTCIFGLGGIAFLGTAVATIGSSLLQAEVDAIAKAREKSKVRLMKVFENMPKKLNHFRTQSRETQKRVLKDAGKSRKKRRRFYEGLIFGSVEELEGRNRMQSILNMVIRVVPSLSIIFGGGAAMKVLNKGWSWTESIYYSLVTASTIGFGDLSPQTRHARMFAILYIPLAVAAAGDLLSGIALSLVQRRQREVYEQQLERDLTIEHLHLMDADGDGKITREEYVQF…		Chloroplast	signal peptide	No mitochondrial presequence	No	No
J43194	SLC4 family HCO3- transporter	MKQSSKRHRKDGALQHTVLWIGILSAFCTTGSAFTSSALGRTKPSSLHLVPGSAAVLNLGRRPGKRSNYLRLSLPADRRTSVGSSKNKDNTDSTNNDATQSIEGTKEDVKEKIQFSPSYLEQIDRMRGYRRKRQWKRVLEEYSNGNSTETTAQKHAKNLFDTIVSQEMRDDIRRRKKVYWSDWEDGFKNKRKVIPAILFLYFACLSPAVSFGTIASEITQGSIGIVEFLLSSGLSGMAYAMMCGQPMAFIAPTGLTLAFISGLYRFCMVKALPFFPIYAWVGLWTSFFFVLLGLGGSSQLIRFCTRFTDEVFNALLSVNFIYEAVASLKRNFDLADPMNLTMPFVSLAMALSTFWCTAKVAAFESSKYLNQKIRSIVKDFGPVTIFILMSIFNQRAWMK…		Chloroplast	chloroplast	No mitochondrial presequence	No	No
J43320	Triose-phosphate Transporter family	MLVIAILLTFVVHFSTAFPPTVSFGSSAYSMSLSTLGSVSPLVSPSSAAAAVSSSPVGTFLQSLSTNTQVVGTAWLVSSALFTTYSTTAFLQYKPPLVAVTPTRRKDQMLVHPDDQRSNFFSLSRPTLLTLYRFGGSLLLGLLLHPDFQIRQRLHETLQAVPTFGLSALFLFVANFSNSISLSRIGISLTYTSKCAIPIITALLTVLLDGPTALPNTLALLSLLPIAAGIAAASWNAPTFERMGFAAALVSAASQSALNVTSKRAMMRSNLTGPSAQRVMVAVGLCITLVVVAMQNYTNQSTKHNDSLVVEEQLKRQIPPVWLSCAAFTAYHAEYVLSFMFVKLVAPITYGTCDAIRRLSVILSGRVFFGGAKLTKLNIAGIALALLGALSYSVTTSL		Chloroplast	chloroplast	No mitochondrial presequence	No	No
J12788	Mitochondrial carrier protein, possible glycine transporter?	MNSFLLWCFCLLPCSALSFTLDKSYSCGKRHHCVAGKQQQLSHRRPSANSASSRRLVADGSVLETIVAGGIAGAIGIGVAFPFDTIRTNAVILNSAANRKKQLQLQQQNVQSGYPVSSTTTASEAERSEAFSSTSLSASMSSTAEYMMESLSSSTITLPIPTFTSTSTTHSNPATSTSSSPSTSSASTSVTDESTPRNANLNMMQITAYIWEREGPQGFFSGVKSMMIGQAIVKAMAFSTNAYMIDFLQVNPLTHNLPHSATLLMAACMAGFVASFVVTPVERVSVLMQAQQTNKYASEMDCFLSVLRKEGPGDLFTRGLGATLCREVPSDGIYFWLYGLLMASPYVGLVPAALAPLLFGGFAGMASWLPIYPVDQVKTIIQNTDDEQAENKSMWSVTQ…		Chloroplast	signal peptide	No mitochondrial presequence	No	No
J13076	Formate/ nitrite transporter	MLMIIRSALLLCLLAGSSAAFAIEQPKAAVHQAVTMSPGGAISLPPAPVSVLDLKPPAALYEGAVAAGVAKASASFGKIFKLGIVSGCHIGFGAYLAIAVGGACPGLAQTNPGLQKIVMGAFGLPFGLIMTLVTGGELFTGNTALVTAAKMEGKISQKALVKNWTASYVGNFVGSLILAYLAYKSGTLGVAPGATNIALAKCSVAWDVAFVRGILCNWLVCMAVYMASGCSTLIGKMTAVWFPISAFVALGLDHSVANMFIIPLGMLRGADITIAQMFVKNLIPVTLGNIVGGAVAVMAPFGLSYGKWFQNKDQL		Chloroplast	chloroplast	No mitochondrial presequence	No	No	RbH homologue in Thalassiosira pseudonana found in plastid proteome
J44665	MFS domain transporter	MFFSRPFCIDGATSLGFPISQLGLLLLGFACMGASCGFERSLLPRMAVQIFNETKASTRLHFVATFGLAKALANAMSGSLADTLGRKPVLILGCLVGLPVMPYVIVANSWSGVTLMNVLFGLSQGLLGSSLFFLLIDLMGSRRRGIAVGMGESTIYVSTAIVNVLAGRLASVYGFRPVPFYVATSISVLGLLSTIPLQDTLDQVRAEQTESERINRKKYARLLSTQPSKLDEERIDTPNCTDRSRLDTTNCGIGETYGSVDEGYVSPWRMSTHTLDTTDKEAVKENDGDMETQPMTAFSFATSCYVSTSRRDQRTSSGPLRSVKMLKSPETSLSSLLLKNRSYVALCFGGMSLNFKDGFCWGSFPVFFKHEHGLSDVRTDWLIAIYPLCWGSAQAFTGA…		Chloroplast	signal peptide	No mitochondrial presequence	No	No
J45852	Tryptophan transporter	MKRSNRLIGILAVATSTAVVLLQTSRIDAFATATLPSTTSYRIPASLKTTQTSSRAFLTSKKKLHSLRSSDRIATSFLSAVVVDTLYSTTTDTGGKLQSKKGSSKTSSSQPKKEGHNLMDFLGPVLSAALLVTGNTFGAGCLVLPELAKGPGMAAFSSLFLGAWTINLVSGLILAEVAIRQKEAAVQQGDDNVVPSSFKEFAQVNLNSSTAANGVSAISVFVNSCVMSFDLSRVGQVGANLSGQAVPNELISAGWGLLLVTILSTQSSKNLSRAASMCATVLFLSFGSLLLPGLAHVTDPWQVWTAPAAIDFTGSLAAAAPVVLMSMIYQNVVPSVTKILNYDRVQTVSALTLGSLLPLVMYVAWCFAWVGGGIDTTIGTTAGIGGLLMTVFSLATLAG…		Chloroplast	chloroplast	No mitochondrial presequence	No	No
J45969	Probable amino acid transporter	MLPNRRFSFVFLLWTATNALRPTSCRSPRQIRSVPSAATASGRFAGKWPRQTPTARFTATTANLDAAKNDDGNSDGGSSVAAATFSLIKAIVGSGCLALPAGVAAVSNYPSALIPANVLMVVLGTMSAYTFTLYGRLTHATQANSLGDLWKKIYKSESSTIVSLANFVYCFGCCLTFNLIIGDMFSSLATAGGLSGLWASRQAAILAVTATTLVPLCNLQSLASLAPVSIIGVLGTVVSTLFLAWRCPEIVPSSPYAKVGKGMLASIPSAMQPQFKTYSRLQTPAPLILIAMACVSFMAHFSAPDFYRSLAGKNVDQRKTEKTMAKFNTMTVAGYVVVGIINALTLTFGFLTFGGNSAGVVLNNYANADIGASVSRLLVAISVIGGFPFLFSACRSAAL…		Chloroplast	signal peptide	No mitochondrial presequence	No	No
J46051	Unclear: probable ABC transporter ATP-binding protein family	MSDSPSRVLFLVAVWIGLLVAVAIPSQTLAFSIPLQECSNSATPESWAGMLPSQVRFSDVTQHYPVTWTRRLFSSEPRRHFAVRHITLKVSSCFLQITGASSSGKSTILRLIHGQEQPSGGAVEIASQYHSRDNNRTRPRNALPIYLDAKPSWDHTKTLEQYMDDTVRKYGSLDALTHDAVHELKTHICTIFAFDVGSKMWLRRKAVDLSPSESYRFRLILACLQSSLGHARMVVVDPHDRHEPRRLPAPILLLDEWMDQETSSVVQTVLAGLRKLVQAGAVVVSVTHKPERWKTPVPASQATFCREIVLCRGEILSSTL		Chloroplast	signal peptide	No mitochondrial presequence	No	No
J47805	Copper transporter protein	MTNRLCTVLLAAGVFSESHVTFASQNTASVSDFHSVPAFTVEELSFGHRTNDLAEALRSTGMIAVKLDHHVKHNDFDIAESRRIALGGLCGCASSDASSLFQSVSGADTSLLSDGLTTRSTFATATVGGTPLQLPVEGLEKACGRETTAAMESLRDNVAVASRSFVSAVDRLRRDSSALPNSLAPILQNIQGGTYSSLASIVKASTHLEHFHLYSKQQRQAPSGMSQASDMEEVLQVHTDAGLFLSFVPGLACGNSHTSESEHFSVLIHGKLHRAVFPPDSVGIMLGAGAQHWLKNVDSLELHATHHAVQMPSGSARAWYGMMHLVPQNAIIQEDPEPKTFADMRKAMVLSGSKTHKYGGGSLQTDEALSIGCGAGSQKINDHNFGSFGVSASRRHRRR…		Chloroplast	signal peptide	No mitochondrial presequence	No	No
J48145	EamA-like/ Drug-Metabolite transporter family	MNSLARACCLILTLVGTTYAFSNAYPSFATRSLLYGQSYSRASTPWYRRYASLQEPVLEDLSTSKNGLIRVSQNETLAVIVPRDEASVVASDILGSTESGTPETTVWRDRTTQSILLLNMVAILWGSQHAVIKGVIADSAPSAFTFLRFGLAALCASPYTPGLAQLWAKLTKGEDLDAIVSEESNPTNVSSTWRWGAEMGFWMFLGFSFQAIGLEFTTAQRSGFLLYLNVKFVPFLARILLGRAISNATWLSALTAFAGTALLAYGSNGNVLDLNVGDLWTIAAAVSSAMFILRLEKASSVVANSAALNAACLWVVTGLAGIWTFWEGNPFQATAAASVCFNPAAEVMSIALTHPWEIVYLSAVTTALVNWVQTKAQKDVSAERASVIYAMDPVYGAGF…		Chloroplast	chloroplast	No mitochondrial presequence	No	No
J48718	Permease	MAAFLESWHEAAITSLGLFWTAFWAFALGYLISSMIQVFVTRKKMQELMGVEGVKSIALATFFGFVSSSCSFAALSGARSLFAKGAGLVPALSFLLASTNLVIELGIVIAVFLSWEFVVGEYVGGIILILLTWLLVHFTTRFAPVEEARQRALKHENAGSEGQGSHGNQRRRNEGESMKDGASRDKRNSDTEREVEDGDASDDDDHESRDEDNQGSMKPHKFFAKDSWEQVAMRYFMEWNMVWKDVTVGFTVAGIVSAFVPNSFFNWLFISGDDPSFWELLEECLVGPVAAFFTFIGSMGNIPLAAVLFENGVSFAGIMAFIFSDLVVIPIIRINAKYYGLKMALYILGVFLTVLVATALILYYVFDVIGILPSPESVDSLSERDFFELNYTFGLNIIF…		Chloroplast	chloroplast	No mitochondrial presequence	No	No
J49053	ATP synthase-related transporter	MYGRGSPQEIGVGLVGKILFITAIVVVVCVSLTQPWSKMSASAASRKVVQSVAHRVEIDWSRHVWSCSPQVAASFNKLKSWVALSDSMAEKYATLPTPIDFGKAKSAVRDKSLVDSLEAFYKSNQAPAETHEWAPEEQELTAKKIAYLQELDAMHQELLPVLEAELAFQKNNRTTSDTTVFDMKVNYPVIHEEIEDEIERREWFKDTGIGPNNCPITIGPVSCPQRRSRRLETLVMENGWEQTQTQFQNPQCWVVQSLRKLKGLILCQSGTNRSVQNHHNFTMDPLLLARKLRRRRGRSILASQLSNAAVTLCTGAVVAMILAALHVSRLNTDRGVPNAPESLPRSRRPGAPMVFGQRQLREARVEHARSGNSDASTPLDFVVAGFPKTGTTTLLYAFR…		Chloroplast	signal peptide	No mitochondrial presequence	No	No
J49936	MFS domain transporter	MRITASCTRSFFGCCLLLSHGAFAFVSPYRHSIAIPARGKHQDLLTLSFIQQKQTSREISVSAASPALSLLRMKPHGPDGNNEDHHLQRGDMEPQVFPQRWVQLAYLSALALLSDWICFATAATPGVYERAFGHSSASLIDIFLFTNVATCFLVTDIVNRFGLQKAIQGAAVLMMVGCWLRSGVSFLPFVPEDLHLVSYPVVVFGTILVGAAQPFFQCTPPLLSALWFASSERATSTAVALNFNQIGIATAFLVGGAMAVDSVGLANYFGLIAVLCTVVTAGTLLQFEDEPLVPPSASEMEKLLAGEKEPPFLESVQKFFKTPGFTKALAAFVCSISITNIVGAFIDEIMTRGGIIDQLSIDLAGAGFEFAILFGGILIGGYVDRSKEYKKISMICLAA…		Chloroplast	signal peptide	No mitochondrial presequence	No	No
J49985	Amino acid transporter	MRSSVFLCSASVAVVWSASALATSSALSLVRPFDVRGGATSHVSTNSNNKTSKNKLARDQVTSQKIGSSPARSSINSKSALLVSPPAVGDLRGGDASKGGTASIPNEVFNLVKSIVGAGVLSLPYGVAVFGNAPSALIPALALVALMGSLSAYTFGLIGRVCQRTNTSSYAAAWDKTVGTSSSWLIAFSCFIDCFAGNLSYSMILADTFVNLLASAGVAVTRTQSLLGVTGAVLLPLCLLKNLSSLAPFSLVGIIGMLYTTLAMGFRYFGGTYAPEGIYYTTQLATPIFGTAGAAAALTPKALILACMLSNAFIAHFLAPNLLADLKNNTMRRFHTMIAWSFGTAVAIYGAITAFGFLTFGAASNGLILNNYAATDVVASLSRIAVAVSITCSYPLLFV…		Chloroplast	chloroplast	No mitochondrial presequence	No	No
J50071	Amino acid transporter	MGLVRHITRSRLVIAIFLSTGVYTSCALSTRSLSVSSSSLRSASTLQPSSLPVYPACSVAPLYASVASSGKDVPREKADALTTNVASVGTGTASSTQLIFTLVKAIVGAGVLTLPAGIASFGNAPSAAIPALGLITVIGILSGYGFALIGRVCHLTGTSSYREAWKASVGEPSSWIPAWSVTLKTIFAVLAYSMILGETFQSLFLTAGLAWSKTAVLTTITSVVLLPLCLLKNLSSLAPFSLLGSLGMLYTAVAMGIRYFGKAYVGSGKFAQDLPFNLQPAFGTIGASGVFNTQTSILVGMLSTAYMAHFNAPRIYAELENNTVPRYLKVVASSFAISIGLFATMASLGFLTFGAHSSGLILNNYSVRDTLMGISRLAVALSIVFSYPLAFVGARDGVL…		Chloroplast	signal peptide	No mitochondrial presequence	No	No
J50540	Chloroplast transport protein Tic110	MKFTGVALAVSLAQQQALSNTGGGIVGAYTVSSPSFFTPKSFGSSFVRGPSHKVFHPRRQAYQKSYATSTRATLTMFTETSGGMEELNELTEKADSSPLSKQVRKSPSFWKLAGYASIPLSAALGFGLVPSRRLAAHTVGALFTGIAGAVGKSRLDALTESNAKPAIAQAIVEAGLDDPDKAAAAVENVKTQFGLLDEDFAILTTEIYTAYLLGMVKYNPTAKTSELKELETVKNVLQLDNLQVGEAHAAAAAEWYRTTCLFTPTEDLEDPSHPDRQAMDKFLFLTERALKQGGETDEAFSFEMKRVAKAFDLSYTEVLERVAETVEPFYQRALKSTRSKLGTNQVSSAMLERARKTLGVSDATAKDLHVACFNAQVRAELGLPDATAKDDDAAAGQED…		Other	chloroplast	No mitochondrial presequence	No	No	RbH homologue in Thalassiosira pseudonana found in plastid proteome
EG00042	Predicted as sulfotransferase family protein based on PFAM and NCBI BlastP	MRPVVAVATFAVSLAVLFATYQSRTHIFSSSTPTRLYQPSTVSETLAQAVPLDPDGNTQGQQVVEQLRAKLGIPHDLLRTSDTEEGPVQPRQFLHLHHMKTGGTSMDGLIRCAMQRYRSQHGTLPYQNIHECSAARYARCLSGDDTQCVGKVQEAAIMSYCAPLRDLTTFQWTRTTSGGSDNGEEGGIVPSTDTTPIRAVTVLRHPVDRVWSMYRFRTKACYGCRDLKDVYAEIDSGNSTLDRMCALQLQNHQTNNLLSSTNFNETTIATARGTPQQRQQIISEAIRNMHDFFTMVGLTEELNTTAAMVGRVFPWLATDVNGTVCGLPHSNASPQNNHCGSRTGNARDRSGSTHWDLPSRPDDATAQLIRKHNELDMALYEAAVDLFRLQKEALGL		Chloroplast	signal peptide	No mitochondrial presequence	No	No
EG00808	Sulfate transporter	MQFYSTAFLFLVCLTKGVACFNPSHSKFVVRSPISPTALPYDSNKNKDQPELAIPSSDDSSQPPPSTIESVVENAKLLWRKTDDRADTFVASSAAGLAVALAMVPEAVAFSFVAGVNPLVGLWTTVTLGLVAAALGGRAGICSSASGACSVVVASLCAMKGPAYLSACAILAGLFQIAGGILGLGKFIRLVPHPVMLGFVNGLAVLMTKSQLVHFKGLSLSSKTGLATYGLTALTMALVKMLPKATKVLPPTLGAVAFATLLTAVFKLPVTKLTDVAGASTFVGGWNVIPAFGIPSIVLSWETSKTILPFAITMAAVGSIESLLTMQLLDGMMDDGKRGSTRREMLGQGAGNMVSGLFGGIGGCALLGQSIINVQSGGGASRWSGMSMALFLAAGIVVA…		Chloroplast	chloroplast	No mitochondrial presequence	No	No
Notes:
1		A. thaliana transporters that have BLASTp homologues as plastid transporters in P. tricornutum genome
		A. thaliana transporters that have BLASTp homologues in P. tricornutum genome, none of them were annotated as plastid transporters in P. tricornutum genome
		A. thaliana transporters didn't find BLASTp homologues in P. tricornutum genome
2	Column G: red color represent transporters that possess mitochondrial presequence in Mitofates, they might be dual-targeted transporters

## Sheet: Filtered BLASTp original output
P. tricornutum gene ID	A. thaliana gene ID	Identity	E-value	Homologue as Plastid Transporter
EG02328	AT1G49810	54.39	6e-147	NO
EG02328	AT3G19490	56.7	4e-153	Yes
EG02593	AT1G26440	34.55	7e-20	NO
EG02593	AT2G03530	30.93	1e-35	NO
EG02593	AT2G03530	30.93	1e-35	NO
EG02593	AT2G03600	34.76	6e-10	NO
J10409	AT1G14660	30.77	4e-66	NO
J10409	AT2G01980	32.46	6e-69	NO
J10896	AT1G07030	34.21	2e-16	NO
J10896	AT3G21390	30.85	3e-06	NO
J10896	AT4G01100	31.93	5e-10	NO
J10896	AT4G26180	32.48	4e-14	NO
J10896	AT5G01340	40	5e-06	NO
J11414	AT3G48850	30.72	8e-34	NO
J11414	AT5G14040	32.08	6e-33	NO
J11866	AT2G17270	31.72	9e-35	NO
J11866	AT3G48850	33.56	1e-45	NO
J11866	AT5G14040	32.52	5e-41	NO
J14403	AT1G54370	32.79	1e-49	NO
J14403	AT1G79610	32.37	2e-61	NO
J14544	AT1G19910	38.29	1e-33	NO
J14544	AT1G75630	38.59	9e-35	NO
J14544	AT1G75630	38.29	1e-33	NO
J14544	AT2G16510	38.29	1e-33	NO
J14544	AT4G34720	38.29	1e-33	NO
J14544	AT4G38920	38.29	1e-33	NO
J16142	AT1G51460	30.69	3e-06	NO
J16142	AT1G64550	30.19	2e-65	NO
J16142	AT3G13640	32.24	3e-06	NO
J16142	AT3G54540	30.65	4e-62	NO
J16142	AT4G19210	30.11	6e-08	NO
J16142	AT5G06530	30.06	2e-06	NO
J16142	AT5G06530	30.06	3e-06	NO
J16142	AT5G06530	30.06	3e-06	NO
J16142	AT5G09930	32	3e-65	NO
J16142	AT5G60790	30.94	3e-67	NO
J16142	AT5G64840	31.33	2e-62	NO
J16421	AT1G64650	38.62	3e-87	NO
J16421	AT1G64650	38.69	6e-84	NO
J16421	AT3G49310	36.65	3e-82	NO
J16421	AT4G27720	39.06	3e-85	NO
J1764	AT1G54370	34.48	7e-38	NO
J1764	AT1G79610	35.38	2e-49	NO
J1764	AT3G05030	30.46	2e-30	NO
J1764	AT3G05030	32.47	2e-18	NO
J1764	AT3G06370	34.9	3e-32	NO
J1764	AT5G27150	35.02	7e-29	NO
J1764	AT5G55470	33.44	1e-34	NO
J18945	AT1G64650	35.12	2e-74	NO
J18945	AT1G64650	35.96	1e-70	NO
J18945	AT3G49310	33.11	5e-71	NO
J18945	AT4G27720	35.08	3e-72	NO
J22325	AT1G02520	30.76	2e-47	NO
J22325	AT1G04120	30.12	3e-25	NO
J22325	AT1G10680	30.51	4e-50	NO
J22325	AT1G53270	40.62	4e-13	NO
J22325	AT1G67940	32.27	2e-22	NO
J22325	AT1G71330	32.67	3e-14	NO
J22325	AT2G07680	30.63	2e-18	NO
J22325	AT2G13610	30.05	1e-16	NO
J22325	AT2G34660	30.65	2e-21	NO
J22325	AT2G34660	30.65	2e-21	NO
J22325	AT2G37360	31.3	1e-17	NO
J22325	AT2G39350	30.04	7e-15	NO
J22325	AT2G47000	31.09	1e-48	NO
J22325	AT2G47800	31.3	3e-25	NO
J22325	AT3G13640	30.1	7e-06	NO
J22325	AT3G21250	30.98	1e-27	NO
J22325	AT3G21250	30.98	2e-27	NO
J22325	AT3G47730	31.25	3e-07	NO
J22325	AT3G53480	30.53	2e-06	NO
J22325	AT3G53510	31.06	3e-16	NO
J22325	AT3G55090	32.46	3e-16	NO
J22325	AT3G55100	32.6	1e-16	NO
J22325	AT3G55130	30.86	7e-16	NO
J22325	AT3G60160	30.27	7e-19	NO
J22325	AT3G60970	30.86	9e-25	NO
J22325	AT3G62150	31.78	2e-50	NO
J22325	AT4G01830	30.11	4e-47	NO
J22325	AT4G15215	31.82	1e-06	NO
J22325	AT4G18050	32.66	1e-34	NO
J22325	AT4G25750	33.64	4e-18	NO
J22325	AT4G25960	30.28	6e-52	NO
J22325	AT5G13580	30.4	1e-15	NO
J22325	AT5G19410	30.12	5e-17	NO
J22325	AT5G39040	30.32	1e-54	NO
J22325	AT5G61730	30.53	2e-07	NO
J22332	AT1G02520	30.58	2e-47	NO
J22332	AT1G04120	30.12	3e-25	NO
J22332	AT1G10680	30.32	2e-49	NO
J22332	AT1G53270	40.62	5e-13	NO
J22332	AT1G67940	32.27	2e-22	NO
J22332	AT1G71330	32.67	1e-14	NO
J22332	AT2G07680	30.63	2e-18	NO
J22332	AT2G13610	30.05	1e-16	NO
J22332	AT2G34660	30.65	2e-21	NO
J22332	AT2G34660	30.65	2e-21	NO
J22332	AT2G37360	31.3	1e-17	NO
J22332	AT2G39350	30.04	6e-15	NO
J22332	AT2G47000	30.91	4e-48	NO
J22332	AT2G47800	31.7	2e-25	NO
J22332	AT3G13080	30.13	4e-14	NO
J22332	AT3G13080	30.13	4e-14	NO
J22332	AT3G13640	30.1	4e-06	NO
J22332	AT3G21250	30.98	1e-27	NO
J22332	AT3G21250	30.98	2e-27	NO
J22332	AT3G47730	31.25	3e-07	NO
J22332	AT3G53480	30.53	2e-06	NO
J22332	AT3G53510	31.06	3e-16	NO
J22332	AT3G55090	32.46	3e-16	NO
J22332	AT3G55100	32.6	1e-16	NO
J22332	AT3G55130	30.86	4e-16	NO
J22332	AT3G60160	30.77	8e-19	NO
J22332	AT3G60970	30.86	1e-24	NO
J22332	AT3G62150	31.59	5e-50	NO
J22332	AT4G01820	30.34	1e-47	NO
J22332	AT4G01830	30.3	2e-46	NO
J22332	AT4G15215	31.82	1e-06	NO
J22332	AT4G15230	30.93	2e-06	NO
J22332	AT4G18050	32.32	4e-34	NO
J22332	AT4G25750	33.96	5e-18	NO
J22332	AT5G13580	30.26	1e-15	NO
J22332	AT5G19410	30.12	6e-17	NO
J22332	AT5G39040	30.49	2e-55	NO
J22332	AT5G61730	30.53	1e-07	NO
J22803	AT1G54350	41.49	7e-155	Yes
J22803	AT2G13610	30.1	1e-08	NO
J22803	AT4G39850	32.83	4e-34	NO
J23830	AT3G26570	43.51	2e-31	Yes
J23830	AT3G26570	31.34	1e-29	Yes
J23830	AT3G26570	43.51	3e-31	Yes
J23830	AT3G26570	31.34	1e-29	Yes
J24610	AT1G61800	30.41	4e-32	Yes
J24610	AT3G01550	32.83	4e-29	Yes
J24610	AT5G17630	31.88	1e-34	Yes
J24610	AT5G33320	32.76	1e-40	Yes
J24610	AT5G46110	30.51	1e-37	Yes
J24610	AT5G46110	30.51	2e-37	Yes
J24610	AT5G46110	31.91	2e-35	Yes
J24610	AT5G46110	31.52	4e-35	Yes
J24610	AT5G54800	30.88	6e-35	Yes
J3046	AT1G78560	41.53	5e-69	Yes
J3046	AT2G26900	47.11	7e-85	Yes
J3046	AT3G25410	32.95	5e-45	NO
J3046	AT4G12030	30.63	6e-43	Yes
J3046	AT4G12030	32.72	4e-33	Yes
J3046	AT4G22840	32.38	7e-45	Yes
J34949	AT5G17670	30.96	2e-26	NO
J39274	AT1G01790	30.99	3e-52	Yes
J39274	AT4G00630	30.49	5e-48	NO
J39274	AT4G00630	30.19	5e-46	NO
J39274	AT4G04850	35.91	8e-88	Yes
J39274	AT4G04850	35.7	1e-80	Yes
J41857	AT1G53270	30.63	1e-06	NO
J41857	AT3G13220	30.32	9e-09	NO
J41857	AT3G60160	31.6	2e-09	NO
J41857	AT3G60970	30.19	4e-08	NO
J41857	AT4G01820	34.71	5e-07	NO
J41857	AT4G33460	30.91	2e-12	Yes
J41857	AT5G64840	30.38	4e-62	NO
J41857	AT5G64840	30.51	9e-25	NO
J41857	AT5G64840	30.35	3e-18	NO
J4286	AT1G78560	41.75	3e-57	Yes
J4286	AT2G26900	34.79	6e-57	Yes
J4286	AT3G25410	32.57	3e-34	NO
J4286	AT4G12030	30.48	4e-33	Yes
J4286	AT4G12030	31.91	2e-28	Yes
J4286	AT4G22840	31.08	2e-31	Yes
J43105	AT1G80770	37.54	5e-60	NO
J43105	AT1G80770	37.77	3e-58	NO
J43105	AT5G18570	37.21	3e-06	NO
J43342	AT4G38260	32.2	5e-18	NO
J43785	AT1G55620	37.93	1e-49	NO
J43785	AT1G55620	32.65	4e-49	NO
J43785	AT3G27170	30.48	1e-06	NO
J43785	AT4G35440	32.3	3e-49	Yes
J43785	AT4G35440	32.3	5e-49	Yes
J44888	AT2G38330	30.14	2e-49	NO
J44888	AT4G38380	30.95	4e-48	NO
J45119	AT2G47830	31.3	3e-37	NO
J45119	AT2G47830	30.68	2e-36	NO
J45335	AT1G50700	33.33	8e-06	NO
J45335	AT1G61950	46.03	3e-06	NO
J45335	AT2G47840	34.44	1e-14	NO
J45335	AT3G03430	42.65	1e-06	NO
J45335	AT3G20410	33.33	4e-06	NO
J45335	AT3G51850	34.68	9e-08	NO
J45335	AT4G04695	35.71	7e-07	NO
J45335	AT4G04700	43.66	4e-07	NO
J45335	AT4G04720	32.89	9e-08	NO
J45335	AT5G12480	34.62	1e-06	NO
J45335	AT5G12480	34.62	2e-06	NO
J45335	AT5G19450	34.62	5e-06	NO
J45335	AT5G19450	34.62	5e-06	NO
J45335	AT5G55710	30.9	3e-15	NO
J45579	AT5G17670	30.53	2e-16	NO
J45656	AT1G15460	33.86	4e-08	NO
J45656	AT1G74810	31.14	2e-09	NO
J45656	AT3G06450	34.65	2e-10	NO
J45656	AT3G06450	34.65	2e-10	NO
J45656	AT4G32510	30.72	8e-08	NO
J45656	AT5G25430	30.56	1e-07	NO
J46742	AT1G07030	30.18	9e-07	NO
J47958	AT3G16250	32.43	6e-13	NO
J47958	AT4G32590	33.61	6e-06	NO
J49533	AT1G15500	58.62	0	Yes
J49533	AT1G80300	59.11	0	Yes
J50613	AT3G44880	32.07	2e-53	NO
J52200	AT5G28750	42.7	1e-12	NO
J54017	AT1G61800	34.41	1e-65	Yes
J54017	AT3G01550	39.29	6e-65	Yes
J54017	AT5G17630	38.89	3e-66	Yes
J54017	AT5G33320	42.17	2e-67	Yes
J54017	AT5G46110	37.58	1e-62	Yes
J54017	AT5G46110	37.58	1e-62	Yes
J54017	AT5G46110	37.59	8e-62	Yes
J54017	AT5G46110	37.37	2e-58	Yes
J54017	AT5G54800	36.16	4e-65	Yes
Note:
	Duplications were caused because of genes originates from different name trimming, and they may have different splicing. The code name is not univocal and this is also the reason why sometimes same gene ID in this list will have different BLASTp e-value, the final result analysis was not affected

## Sheet: Location in A. thaliana cell
Phaeodactylum gene model	Location predicted of the homologues in A				Figure
	WolfPSort output	Prediction	Suba4	LocDB
EG02328	plas 7 chlo 5 E.R. 1 pero 1	Plasma Membrane	plastid	uk	Chloroplast
J22803	chlo 6 plas 5 vacu 1 E.R. 1 pero 1 E.R._vacu 1	Chloroplast	plastid	plastid	Chloroplast
J23830	chlo 13	Chloroplast	plastid	plastid/chloroplast/stroma	Chloroplast
J24610	chlo 13	Chloroplast	plastid	plastid/chloroplast/stroma	Chloroplast
J3046	chlo 10 chlo_mito 8 mito 4	Chloroplast	plastid	plastid	Chloroplast
J34949	chlo 12 mito 2	Chloroplast	plastid	plastid/chloroplast	Chloroplast
J39274	chlo 10 plas 4	Chloroplast	plastid	plastid	Chloroplast
J41857	chlo 13	Chloroplast	plastid	nf	Chloroplast
J4286	chlo 14	Chloroplast	plastid	nf	Chloroplast
J43105	chlo 13.5, chlo_mito 7.5	Chloroplast	uk	uk	Chloroplast
J44888	plas 7 chlo 5 mito 1 E.R. 1	Plasma Membrane	plastid	uk	Chloroplast
J45335	chlo 10.5, chlo_mito 6.5, mito 1.5	Chloroplast	plastid	plastid	Chloroplast
J45579	chlo 12 mito 2	Chloroplast	plastid	plastid/chloroplast	Chloroplast
J47958	chlo 13	Chloroplast	plastid	plastid/vacuole	Chloroplast
J49533	plas 9 chlo 3 E.R. 2	Plasma Membrane	plastid	plastid/stroma	Chloroplast
J50613	chlo 4 mito 3 plas 3 mito_plas 3	Chloroplast	plastid	plastid/chloroplast/stroma	Chloroplast
J52200	chlo 13	Chloroplast	plastid	plastid	Chloroplast
J54017	chlo 13	Chloroplast	plastid	plastid/chloroplast/stroma	Chloroplast
J16421	plas 6 cyto 3 vacu 3 nucl_plas 3 golg_plas 3 cysk_plas 3 mito_plas 3	Plasma Membrane	golgi	vacuole	endomembranes*
J18945	plas 6 cyto 3 vacu 3 nucl_plas 3 golg_plas 3 cysk_plas 3 mito_plas 3	Plasma Membrane	golgi	vacuole	endomembranes*
J43342	nucl 8 cyto 2 cysk 1.5, cyto_pero 1.5, cysk_plas 1.5	Nucleus	extracellular	uk	endomembranes*
J43785	plas 6 chlo 3 cysk_plas 3 E.R._plas 3 mito_plas 3	Plasma Membrane	golgi	golgi	golgi
J10896	cyto 9 chlo 2 pero 2	Cytoplasm	mitochondrion	mitochondrion/vacuole	mitochondrion
J11414	chlo 8 E.R. 2 cyto_nucl 2 nucl 1.5, cyto 1.5	Chloroplast	mitochondrion	mitochondrion	mitochondrion
J11866	chlo 8 E.R. 2 cyto_nucl 2 nucl 1.5, cyto 1.5	Chloroplast	mitochondrion	mitochondrion	mitochondrion
J45119	mito 7 chlo 5 nucl 1 plas 1 nucl_plas 1	Mitochondrion	mitochondrion	vacuole membrane	mitochondrion
J46742	chlo 5 cyto 4 chlo_mito 4	Chloroplast	mitochondrion	uk	mitochondrion
EG02593	extr 5 chlo 3 plas 3 cyto 1 vacu 1 E.R. 1 E.R._vacu 1 cyto_E.R. 1	Secreted	plasma membrane	plasma membrane	plasma membrane
J10409	plas 5 nucl 3 golg_plas 3 cysk_plas 3 cyto_plas 3	Plasma Membrane	plasma membrane	plasma membrane/ plastid	plasma membrane
J16142	nucl 4 mito 3.5, chlo 3 cyto_nucl 3 cyto_mito 2.5	Nucleus	plasma membrane	plasma membrane	plasma membrane
J45656	plas 7 E.R. 5 vacu 1 golg 1	Plasma Membrane	uk	uk	plasma membrane
J14403	cyto 6 plas 3 cyto_pero 3 cyto_E.R. 3	Cytoplasm	vacuole	vacuole	vacuole
J14544	vacu 14	Vacuole	vacuole/plasma membrane	vacuole/plasma membrane	vacuole
J1764	cyto 6 plas 3 cyto_pero 3 cyto_E.R. 3	Cytoplasm	vacuole	vacuole	vacuole
J22325	E.R. 4 plas 3.5, golg 3 E.R._vacu 3 cyto_plas 2.5	ER	vacuole	vacuole	vacuole
J22332	E.R. 4 plas 3.5, golg 3 E.R._vacu 3 cyto_plas 2.5	ER	vacuole	vacuole	vacuole
